# Supplementary material for: Prevalence, patterns, and associated factors of psychoactive substance use among people living with HIV in Lomé (Togo)
Source: Research Square preprint supplement (doi:10.21203/rs.3.rs-7704826/v1), 2025-10-16
Supplement: Supplementary file 1 [file a53066df11a9ef0aba785e84.pdf]

## QUESTIONNAIRE

---

**Survey date :** |\_\_|\_\_| 20\_\_\_\_| **Identifier** |\_\_\_\_\_|

### SECTION 1: SOCIO-DEMOGRAPHIC DATA

---

1. **Age:** |\_\_\_\_\_| years

2. **Sex:** |\_\_\_\_\_|

Male = 1; Female = 2

3. **Profession:** |\_\_\_\_\_|

Public sector employee = 1; Private sector employee = 2; Informal sector employee = 3 ;  
Homemaker/No profession = 4

4. **Marital Status:** |\_\_\_\_\_|

In a union = 1; Not in a union = 2; Don't know = 99

5. **Last grade/class attended:** |\_\_\_\_\_|

6. **Highest school diploma obtained:** |\_\_\_\_\_|

No diploma = 0; Primary School Certificate (CEPD) = 1; Junior High School Diploma (BEPC) = 2;  
High School Diploma (Baccalaureate) = 3;  $\geq$  Baccalaureate = 4

7. **Place of residence:** |\_\_\_\_\_|

Urban = 1; Rural = 2

8. **Religion:** |\_\_\_\_\_|

No religion or traditional religion = 1; Islam = 2; Christianity = 3;

9. **Do you have children?** |\_\_\_\_\_|

Yes = 1; No = 2; Prefer not to answer = 3

10. If yes, how many children do you have? |\_\_\_\_|

11. Do you live together with your children? |\_\_\_\_|

Yes = 1; No = 2; Prefer not to answer = 3

12. Is one or more of them infected with HIV? |\_\_\_\_|

Yes = 1; No = 2; Prefer not to answer = 3.

## SECTION 2: CLINICAL, BIOLOGICAL AND THERAPEUTIC DATA

---

13. Weight |\_\_\_\_| kg    14. Height |\_\_\_\_| cm

15. Waist circumference |\_\_\_\_| cm    16. Hip circumference |\_\_\_\_| cm

17. Date of HIV diagnosis |\_\_|\_\_| \_\_\_\_|

18. How would you describe your current HIV symptoms? |\_\_\_\_|

None = 1; Mild = 2; Moderate = 3; Severe = 4; Prefer not to answer = 99

19. Current clinical stage: |\_\_\_\_|

Stage I = 1; Stage II = 2; Stage III = 3; Stage IV = 4

20. Are you on ARV treatment? |\_\_\_\_|

Yes = 1; No = 2

21. If yes, treatment start date: |\_\_|\_\_| \_\_\_\_|

22. Therapeutic regimen: |\_\_\_\_|

1st line = 1; 2nd line = 2; 3rd line = 3

23. What type of ARV? |\_\_|

**1st line:** TDF+3TC (or FTC)+EFV = 1; TDF+3TC (or FTC)+NVP = 2; AZT+3TC+EFV = 3; AZT+3TC+NVP = 4; ABC+3TC+NVP = 5; ABC+3TC+EFV = 6; TDF+3TC+DTG (Dolutegravir) = 7

**2nd line:** AZT+3TC+LPV/r = 8; AZT+3TC+ATV/r = 9; TDF+3TC (or FTC)+ATV/r = 10; TDF+3TC (or FTC)+LPV/r = 11; ABC+3TC+LPV/r = 12; ABC+3TC+ATV/r = 13 ;

Other = 14. (please specify if possible) |\_\_\_\_\_|

**3rd line:** TDF+3TC+DRV (Darunavir)/r+RAL (Raltegravir) = 15; AZT+3TC+DRV (Darunavir)/r+RAL (Raltegravir) = 16; ABC+3TC+DRV (Darunavir)/r+RAL (Raltegravir) = 17;

Other = 18 (please specify if possible) |\_\_\_\_\_|

24. Do you understand how to take your ARVs? |\_\_|

Not at all = 1; Moderately = 2; Perfectly = 3

25. In the past month, have you ever forgotten to take your ARVs? |\_\_|

Yes = 1; No = 2

26. If yes, how many times? |\_\_|

27. For what reason(s)? |\_\_\_\_\_|

28. Are you sometimes negligent in taking your ARVs? |\_\_|

Yes = 1; No = 2

29. If you sometimes feel worse, do you stop taking your ARVs? |\_\_|

Yes = 1; No = 2

30. In the past week, how many times did you not take your ARVs? |\_\_|

31. Did you miss taking your ARVs during the last weekend? |\_\_|

Yes = 1; No = 2

32. In the past three months, how many days did you not take your ARVs at all? |\_\_|

33. Date of last check-up: |\_\_|\_|\_| |\_\_\_\_\_|

34. **CD4 count at last check-up:** |\_\_\_\_\_|

35. **Viral load at last check-up** |\_\_\_\_\_| copies/ml.

36. **Compared to people your age, would you say your health is:** |\_\_\_\_\_|

Not at all satisfactory = 1; Slightly satisfactory = 2; Rather satisfactory = 3; Very satisfactory = 4;

37. **Do you regularly take (at least once a week for 6 months) one or more medication(s)?** |\_\_\_\_\_|

Yes, for a physical health problem = 1; Yes, for a psychological problem = 2; No = 3;

If yes, please specify the medication(s) |\_\_\_\_\_

38. **Are you currently being followed by a doctor?** |\_\_\_\_\_|

Yes, for a physical health problem = 1; Yes, for a psychological problem = 2; No = 3;

If yes, please specify the problem(s) |\_\_\_\_\_

### SECTION 3: SEXUAL ACTIVITY

---

39. **Are you sexually active?** |\_\_\_\_\_|

Yes = 1; No = 2; Prefer not to answer = 3

40. **When was your last sexual intercourse?** |\_\_\_\_\_| weeks ago

41. **How many sexual partners have you had in the last three months?** |\_\_\_\_\_|

42. **Sex of your regular partner?** |\_\_\_\_\_|

*[Questions to be asked to men only]*

Male = 1; Female = 2

43. **HIV status of your regular partner?** |\_\_\_\_\_|

HIV positive = 1; HIV negative = 2; Has not been tested = 3; Don't know = 99

44. **Have you ever had sexual intercourse under the influence of drugs or alcohol?** |\_\_\_\_\_|

Yes = 1; No = 2

45. In the last three (3) months, during sexual intercourse with your regular sexual partner, did you use a condom? |\_\_\_\_|

Never = 1; Rarely = 2; Often = 3; Very often = 4; Always = 5

46. In the last three (3) months, during sexual intercourse with your casual sexual partner, did you use a condom? |\_\_\_\_|

Never = 1; Rarely = 2; Often = 3; Very often = 4; Always = 5

47. Your last sexual intercourse was with? |\_\_\_\_|

A regular sexual partner = 1; a casual sexual partner = 2

48. During this last sexual intercourse, did you use a condom? |\_\_\_\_|

Never = 1; Rarely = 2; Often = 3; Very often = 4; Always = 5

#### SECTION 4: ALCOHOL AND TOBACCO CONSUMPTION

---

49. In your lifetime, have you ever drunk alcohol (beer, cider, wine, aperitifs, spirits...)? |\_\_\_\_|

Yes = 1; No = 2

50. In the last 30 days, have you drunk... (multiple answers possible)

| Beverage                                              | No                         | Yes                        |
|-------------------------------------------------------|----------------------------|----------------------------|
| Beer                                                  | 1 <input type="checkbox"/> | 2 <input type="checkbox"/> |
| Strong beer in 50 cl can (type 8.6)                   | 1 <input type="checkbox"/> | 2 <input type="checkbox"/> |
| Wine                                                  | 1 <input type="checkbox"/> | 2 <input type="checkbox"/> |
| Aniseed aperitif (type pastis, Martini, port, muscat) | 1 <input type="checkbox"/> | 2 <input type="checkbox"/> |
| Tchoukoutchou/tchakpalo                               | 1 <input type="checkbox"/> | 2 <input type="checkbox"/> |
| Sodabi                                                | 1 <input type="checkbox"/> | 2 <input type="checkbox"/> |
| Champagne, sparkling wine                             | 1 <input type="checkbox"/> | 2 <input type="checkbox"/> |
| Sangria, punch                                        | 1 <input type="checkbox"/> | 2 <input type="checkbox"/> |
| Rhum (Ti punch...)                                    | 1 <input type="checkbox"/> | 2 <input type="checkbox"/> |
| Spirits (whisky, vodka, calvados, cognac...)          | 1 <input type="checkbox"/> | 2 <input type="checkbox"/> |
| Cocktail (whisky-coke, vodka-orange...)               | 1 <input type="checkbox"/> | 2 <input type="checkbox"/> |
| Other alcoholic beverages (specify)<br> .....         | 1 <input type="checkbox"/> | 2 <input type="checkbox"/> |

**51. What is the frequency of your alcohol consumption?** |\_\_\_\_|

Never = 0; 1 time/month or less = 1; 2 to 4 times per month = 2; 2 to 3 times per week = 3; At least 4 times per week = 4

**52. How many drinks containing alcohol do you consume on a typical day when you drink?** |\_\_\_\_|

1 or 2 = 0; 3 or 4 = 1; 5 or 6 = 2; 7 or 8 = 3; 10 or more = 4

**53. How often do you have 6 or more drinks on one occasion?** |\_\_\_\_|

[One drink = one bottle or a "half-pint" of beer or cider (25 cl), a glass of wine (12 cl), a shot of spirits (4 cl), a cocktail...]

Never = 0; Less than once a week = 1; 1 time/month = 2; 1 time/week = 3; Daily or almost daily = 4

**54. Have people around you made remarks about your alcohol consumption?** |\_\_\_\_|

No = 0; Yes = 4;

**55. Have you ever consumed alcohol in the morning to feel in shape?** |\_\_\_\_|

No = 0; Yes = 4

**56. Have you ever drunk and the next morning could not remember what you had said or done?** |\_\_\_\_|

No = 0; Yes = 4

**57. In your lifetime, have you ever smoked tobacco (at least one cigarette)?** |\_\_\_\_|

No = 1; Yes = 2

**58. Currently, do you smoke tobacco?** |\_\_\_\_|

I smoke every day (at least one cigarette per day) = 1; I smoke occasionally = 2; I used to smoke but I quit = 3; I tried but never became a smoker = 4; I have never smoked = 5

**59. If you smoke daily, at what age did you start smoking every day?** |\_\_\_\_| years

**60. In the last 30 days, have you smoked cigarettes?** |\_\_\_\_|

None = 1; Less than one per day = 2; Between 1 and 5 per day = 3; Between 6 and 10 per day = 4; Between 11 and 20 per day = 5; More than 20 per day = 6

**61. Have you ever consumed coffee or beverages containing caffeine (coca-cola, etc.)?**

Only one cross per line

| Product                                       | No                         | Daily                      | Weekly                     | Monthly                    | Occasionally               | Never                      |
|-----------------------------------------------|----------------------------|----------------------------|----------------------------|----------------------------|----------------------------|----------------------------|
| Coffee                                        | 1 <input type="checkbox"/> | 2 <input type="checkbox"/> | 3 <input type="checkbox"/> | 4 <input type="checkbox"/> | 5 <input type="checkbox"/> | 6 <input type="checkbox"/> |
| Tea                                           | 1 <input type="checkbox"/> | 2 <input type="checkbox"/> | 3 <input type="checkbox"/> | 4 <input type="checkbox"/> | 5 <input type="checkbox"/> | 6 <input type="checkbox"/> |
| Coca-cola                                     | 1 <input type="checkbox"/> | 2 <input type="checkbox"/> | 3 <input type="checkbox"/> | 4 <input type="checkbox"/> | 5 <input type="checkbox"/> | 6 <input type="checkbox"/> |
| Red Bull                                      | 1 <input type="checkbox"/> | 2 <input type="checkbox"/> | 3 <input type="checkbox"/> | 4 <input type="checkbox"/> | 5 <input type="checkbox"/> | 6 <input type="checkbox"/> |
| Dark chocolate                                | 1 <input type="checkbox"/> | 2 <input type="checkbox"/> | 3 <input type="checkbox"/> | 4 <input type="checkbox"/> | 5 <input type="checkbox"/> | 6 <input type="checkbox"/> |
| Milk chocolate                                | 1 <input type="checkbox"/> | 2 <input type="checkbox"/> | 3 <input type="checkbox"/> | 4 <input type="checkbox"/> | 5 <input type="checkbox"/> | 6 <input type="checkbox"/> |
| Cocoa drink                                   | 1 <input type="checkbox"/> | 2 <input type="checkbox"/> | 3 <input type="checkbox"/> | 4 <input type="checkbox"/> | 5 <input type="checkbox"/> | 6 <input type="checkbox"/> |
| Caffeinated pain medication, specify<br>_____ | 1 <input type="checkbox"/> | 2 <input type="checkbox"/> | 3 <input type="checkbox"/> | 4 <input type="checkbox"/> | 5 <input type="checkbox"/> | 6 <input type="checkbox"/> |

**62. On a typical day, what quantity do you consume?**

| Product                                       | Quantity |
|-----------------------------------------------|----------|
| Coffee (number of cups)                       |          |
| Tea (number of cups)                          |          |
| Coca-cola (number of 330ml bottles)           |          |
| Red Bull (number of 330ml bottles)            |          |
| Dark chocolate (100g)                         |          |
| Milk chocolate (100g)                         |          |
| Cocoa drink (250ml)                           |          |
| Caffeinated pain medication, specify<br>_____ |          |

**SECTION 5: ILLICIT SUBSTANCE USE**

---

**63. In your lifetime, have you ever used illicit substances?**

If yes, at what age the first time?

Only one cross per line

| Substance                                                    | No                         | Yes                        | Age (years) |
|--------------------------------------------------------------|----------------------------|----------------------------|-------------|
| Cannabis (hashish, weed, joint, marijuana, shit)             | 1 <input type="checkbox"/> | 2 <input type="checkbox"/> | _____       |
| Medication for nerves, for sleeping                          | 1 <input type="checkbox"/> | 2 <input type="checkbox"/> | _____       |
| Hallucinogenic mushrooms                                     | 1 <input type="checkbox"/> | 2 <input type="checkbox"/> | _____       |
| Poppers                                                      | 1 <input type="checkbox"/> | 2 <input type="checkbox"/> | _____       |
| Products to inhale/sniff (glue, solvents, trichloroethylene) | 1 <input type="checkbox"/> | 2 <input type="checkbox"/> | _____       |
| Ecstasy                                                      | 1 <input type="checkbox"/> | 2 <input type="checkbox"/> | _____       |
| Amphetamines, speed                                          | 1 <input type="checkbox"/> | 2 <input type="checkbox"/> | _____       |
| LSD (acid, blotter)                                          | 1 <input type="checkbox"/> | 2 <input type="checkbox"/> | _____       |
| Crack                                                        | 1 <input type="checkbox"/> | 2 <input type="checkbox"/> | _____       |
| Cocaine                                                      | 1 <input type="checkbox"/> | 2 <input type="checkbox"/> | _____       |

|                                 |                            |                            |                      |
|---------------------------------|----------------------------|----------------------------|----------------------|
| Heroin                          | 1 <input type="checkbox"/> | 2 <input type="checkbox"/> | <input type="text"/> |
| Ketamine                        | 1 <input type="checkbox"/> | 2 <input type="checkbox"/> | <input type="text"/> |
| Subutex                         | 1 <input type="checkbox"/> | 2 <input type="checkbox"/> | <input type="text"/> |
| GHB                             | 1 <input type="checkbox"/> | 2 <input type="checkbox"/> | <input type="text"/> |
| Tramadol                        | 1 <input type="checkbox"/> | 2 <input type="checkbox"/> | <input type="text"/> |
| Moringa                         | 1 <input type="checkbox"/> | 2 <input type="checkbox"/> | <input type="text"/> |
| Other drugs (specify)<br> ..... | 1 <input type="checkbox"/> | 2 <input type="checkbox"/> | <input type="text"/> |

64. What were the reasons that led you to use these substances?

Lack of work = 1; Drugs are cheaper = 2; It's our occupation = 3; Provides pleasure = 4; Suppression of poverty = 5; Illness = 6; Disappointment/discouragement = 7; Other = 14; specify

65. How do you usually consume these substances?

Smoked = 1; Inhaled = 2; Snorted = 3; By intravenous injection = 4; Ingestion (drunk or swallowed) = 5

66. Have you taken any of the following substances in the last 12 months?

Only one cross per line

| Substance                                                    | No                         | 1 or 2 times               | Between 3 and 5 times      | Between 6 and 9 times      | 10 times and more          |
|--------------------------------------------------------------|----------------------------|----------------------------|----------------------------|----------------------------|----------------------------|
| Cannabis (hashish, weed, joint, marijuana, shit)             | 1 <input type="checkbox"/> | 2 <input type="checkbox"/> | 3 <input type="checkbox"/> | 4 <input type="checkbox"/> | 5 <input type="checkbox"/> |
| Medication for nerves, for sleeping                          | 1 <input type="checkbox"/> | 2 <input type="checkbox"/> | 3 <input type="checkbox"/> | 4 <input type="checkbox"/> | 5 <input type="checkbox"/> |
| Hallucinogenic mushrooms                                     | 1 <input type="checkbox"/> | 2 <input type="checkbox"/> | 3 <input type="checkbox"/> | 4 <input type="checkbox"/> | 5 <input type="checkbox"/> |
| Poppers                                                      | 1 <input type="checkbox"/> | 2 <input type="checkbox"/> | 3 <input type="checkbox"/> | 4 <input type="checkbox"/> | 5 <input type="checkbox"/> |
| Products to inhale/sniff (glue, solvents, trichloroethylene) | 1 <input type="checkbox"/> | 2 <input type="checkbox"/> | 3 <input type="checkbox"/> | 4 <input type="checkbox"/> | 5 <input type="checkbox"/> |
| Ecstasy                                                      | 1 <input type="checkbox"/> | 2 <input type="checkbox"/> | 3 <input type="checkbox"/> | 4 <input type="checkbox"/> | 5 <input type="checkbox"/> |
| Amphetamines, speed                                          | 1 <input type="checkbox"/> | 2 <input type="checkbox"/> | 3 <input type="checkbox"/> | 4 <input type="checkbox"/> | 5 <input type="checkbox"/> |
| LSD (acid, blotter)                                          | 1 <input type="checkbox"/> | 2 <input type="checkbox"/> | 3 <input type="checkbox"/> | 4 <input type="checkbox"/> | 5 <input type="checkbox"/> |
| Crack                                                        | 1 <input type="checkbox"/> | 2 <input type="checkbox"/> | 3 <input type="checkbox"/> | 4 <input type="checkbox"/> | 5 <input type="checkbox"/> |
| Cocaine                                                      | 1 <input type="checkbox"/> | 2 <input type="checkbox"/> | 3 <input type="checkbox"/> | 4 <input type="checkbox"/> | 5 <input type="checkbox"/> |
| Heroin                                                       | 1 <input type="checkbox"/> | 2 <input type="checkbox"/> | 3 <input type="checkbox"/> | 4 <input type="checkbox"/> | 5 <input type="checkbox"/> |
| Ketamine                                                     | 1 <input type="checkbox"/> | 2 <input type="checkbox"/> | 3 <input type="checkbox"/> | 4 <input type="checkbox"/> | 5 <input type="checkbox"/> |
| Subutex                                                      | 1 <input type="checkbox"/> | 2 <input type="checkbox"/> | 3 <input type="checkbox"/> | 4 <input type="checkbox"/> | 5 <input type="checkbox"/> |
| GHB                                                          | 1 <input type="checkbox"/> | 2 <input type="checkbox"/> | 3 <input type="checkbox"/> | 4 <input type="checkbox"/> | 5 <input type="checkbox"/> |
| Tramadol                                                     | 1 <input type="checkbox"/> | 2 <input type="checkbox"/> | 3 <input type="checkbox"/> | 4 <input type="checkbox"/> | 5 <input type="checkbox"/> |
| Moringa                                                      | 1 <input type="checkbox"/> | 2 <input type="checkbox"/> | 3 <input type="checkbox"/> | 4 <input type="checkbox"/> | 5 <input type="checkbox"/> |
| Other drugs (specify)<br> .....                              | 1 <input type="checkbox"/> | 2 <input type="checkbox"/> | 3 <input type="checkbox"/> | 4 <input type="checkbox"/> | 5 <input type="checkbox"/> |



**67. Have you taken any of the following products in the last 30 days?**

Only one cross per line

| Substance                                                       | No                         | 1 or<br>2<br>times         | 3 to 5<br>times            | 6 to 9<br>times            | 10 to<br>19<br>times       | 20 to<br>29<br>times       | Every<br>day               |
|-----------------------------------------------------------------|----------------------------|----------------------------|----------------------------|----------------------------|----------------------------|----------------------------|----------------------------|
| Cannabis (hashish, weed, joint, marijuana, shit)                | 1 <input type="checkbox"/> | 2 <input type="checkbox"/> | 3 <input type="checkbox"/> | 4 <input type="checkbox"/> | 5 <input type="checkbox"/> | 6 <input type="checkbox"/> | 7 <input type="checkbox"/> |
| Medication for nerves, for sleeping                             | 1 <input type="checkbox"/> | 2 <input type="checkbox"/> | 3 <input type="checkbox"/> | 4 <input type="checkbox"/> | 5 <input type="checkbox"/> | 6 <input type="checkbox"/> | 7 <input type="checkbox"/> |
| Hallucinogenic mushrooms                                        | 1 <input type="checkbox"/> | 2 <input type="checkbox"/> | 3 <input type="checkbox"/> | 4 <input type="checkbox"/> | 5 <input type="checkbox"/> | 6 <input type="checkbox"/> | 7 <input type="checkbox"/> |
| Poppers                                                         | 1 <input type="checkbox"/> | 2 <input type="checkbox"/> | 3 <input type="checkbox"/> | 4 <input type="checkbox"/> | 5 <input type="checkbox"/> | 6 <input type="checkbox"/> | 7 <input type="checkbox"/> |
| Products to inhale/sniff (glue, solvents,<br>trichloroethylene) | 1 <input type="checkbox"/> | 2 <input type="checkbox"/> | 3 <input type="checkbox"/> | 4 <input type="checkbox"/> | 5 <input type="checkbox"/> | 6 <input type="checkbox"/> | 7 <input type="checkbox"/> |
| Ecstasy                                                         | 1 <input type="checkbox"/> | 2 <input type="checkbox"/> | 3 <input type="checkbox"/> | 4 <input type="checkbox"/> | 5 <input type="checkbox"/> | 6 <input type="checkbox"/> | 7 <input type="checkbox"/> |
| Amphetamines, speed                                             | 1 <input type="checkbox"/> | 2 <input type="checkbox"/> | 3 <input type="checkbox"/> | 4 <input type="checkbox"/> | 5 <input type="checkbox"/> | 6 <input type="checkbox"/> | 7 <input type="checkbox"/> |
| LSD (acid, blotter)                                             | 1 <input type="checkbox"/> | 2 <input type="checkbox"/> | 3 <input type="checkbox"/> | 4 <input type="checkbox"/> | 5 <input type="checkbox"/> | 6 <input type="checkbox"/> | 7 <input type="checkbox"/> |
| Crack                                                           | 1 <input type="checkbox"/> | 2 <input type="checkbox"/> | 3 <input type="checkbox"/> | 4 <input type="checkbox"/> | 5 <input type="checkbox"/> | 6 <input type="checkbox"/> | 7 <input type="checkbox"/> |
| Cocaine                                                         | 1 <input type="checkbox"/> | 2 <input type="checkbox"/> | 3 <input type="checkbox"/> | 4 <input type="checkbox"/> | 5 <input type="checkbox"/> | 6 <input type="checkbox"/> | 7 <input type="checkbox"/> |
| Heroin                                                          | 1 <input type="checkbox"/> | 2 <input type="checkbox"/> | 3 <input type="checkbox"/> | 4 <input type="checkbox"/> | 5 <input type="checkbox"/> | 6 <input type="checkbox"/> | 7 <input type="checkbox"/> |
| Ketamine                                                        | 1 <input type="checkbox"/> | 2 <input type="checkbox"/> | 3 <input type="checkbox"/> | 4 <input type="checkbox"/> | 5 <input type="checkbox"/> | 6 <input type="checkbox"/> | 7 <input type="checkbox"/> |
| Subutex                                                         | 1 <input type="checkbox"/> | 2 <input type="checkbox"/> | 3 <input type="checkbox"/> | 4 <input type="checkbox"/> | 5 <input type="checkbox"/> | 6 <input type="checkbox"/> | 7 <input type="checkbox"/> |
| GHB                                                             | 1 <input type="checkbox"/> | 2 <input type="checkbox"/> | 3 <input type="checkbox"/> | 4 <input type="checkbox"/> | 5 <input type="checkbox"/> | 6 <input type="checkbox"/> | 7 <input type="checkbox"/> |
| Tramadol                                                        | 1 <input type="checkbox"/> | 2 <input type="checkbox"/> | 3 <input type="checkbox"/> | 4 <input type="checkbox"/> | 5 <input type="checkbox"/> | 6 <input type="checkbox"/> | 7 <input type="checkbox"/> |
| Moringa                                                         | 1 <input type="checkbox"/> | 2 <input type="checkbox"/> | 3 <input type="checkbox"/> | 4 <input type="checkbox"/> | 5 <input type="checkbox"/> | 6 <input type="checkbox"/> | 7 <input type="checkbox"/> |
| Other drugs (specify)<br> .....                                 | 1 <input type="checkbox"/> | 2 <input type="checkbox"/> | 3 <input type="checkbox"/> | 4 <input type="checkbox"/> | 5 <input type="checkbox"/> | 6 <input type="checkbox"/> | 7 <input type="checkbox"/> |
